# Supplementary material
Source: Springer Nature journal article supplement (https://www.springermedizin.de/resource/supplementary/13075_2010_2888_MOESM3_ESM.pdf/9693120)

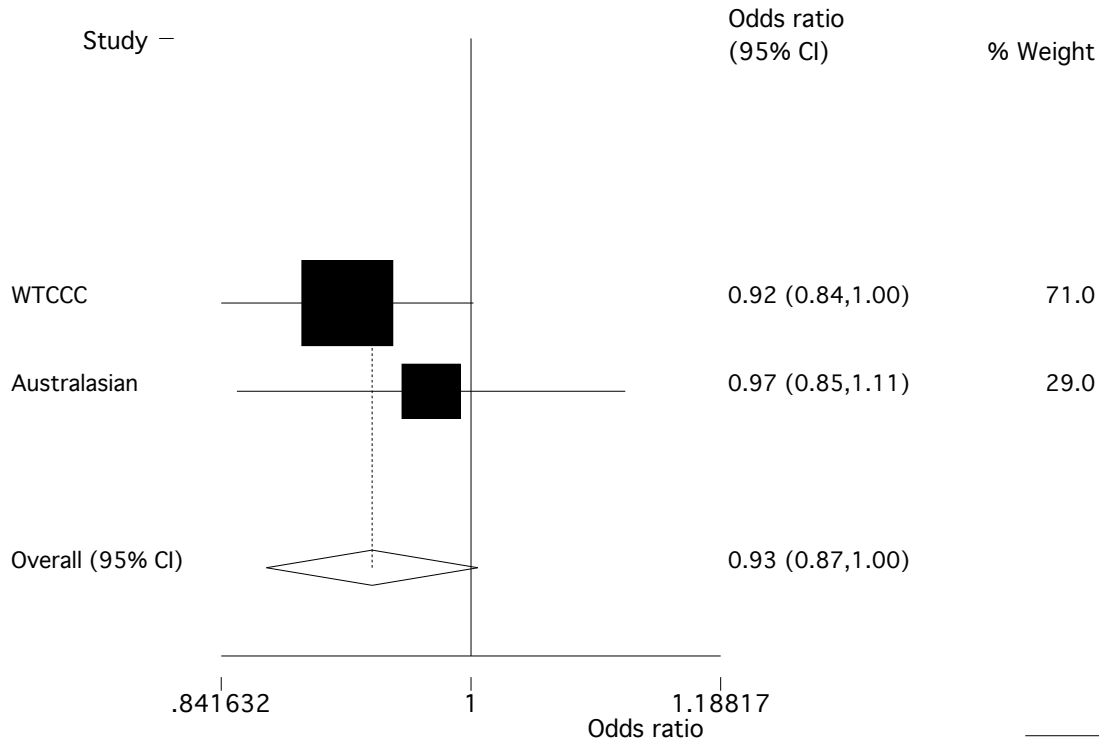

Supplement: MOESM3 [file 9693120]
